# Supplementary material for: An Active Self-Driven Piezoelectric Sensor Enabling Real-Time Respiration Monitoring
Source: PubMed Central journal article supplement (PMC6679499; doi:10.3390/s19143241), 2019-07-23
Supplement: sensors-19-03241-s001.pdf [file sensors-19-03241-s001.pdf]

## Supplementary Information

for

# An Active Self-Driven Piezoelectric Sensor Enabling Real-Time Respiration Monitoring

**Ahmed Rasheed**<sup>1,2</sup>, **Emad Iranmanesh**<sup>1</sup>, **Weiwei Li**<sup>1,2</sup>, **Yangbing Xu**<sup>1,2</sup>, **Qi Zhou**<sup>1,2</sup>, **Hai Ou**<sup>1</sup> and **Kai Wang**<sup>1,2\*</sup>

<sup>1</sup> Guangdong Province Key Laboratory of Display Material and Technology, State Key Laboratory of Optoelectronic Materials and Technologies, School of Electronics and Information Technology, Sun Yat-sen University, No. 132 East Waihuan Road, Guangzhou 510006, P. R. China.

<sup>2</sup> Sun Yat-sen University Shunde Research Institute, No. 9 Eastern Nanguo Road, Shunde District, Foshan 523800, P. R. China.

\* Correspondence: wangkai23@mail.sysu.edu.cn

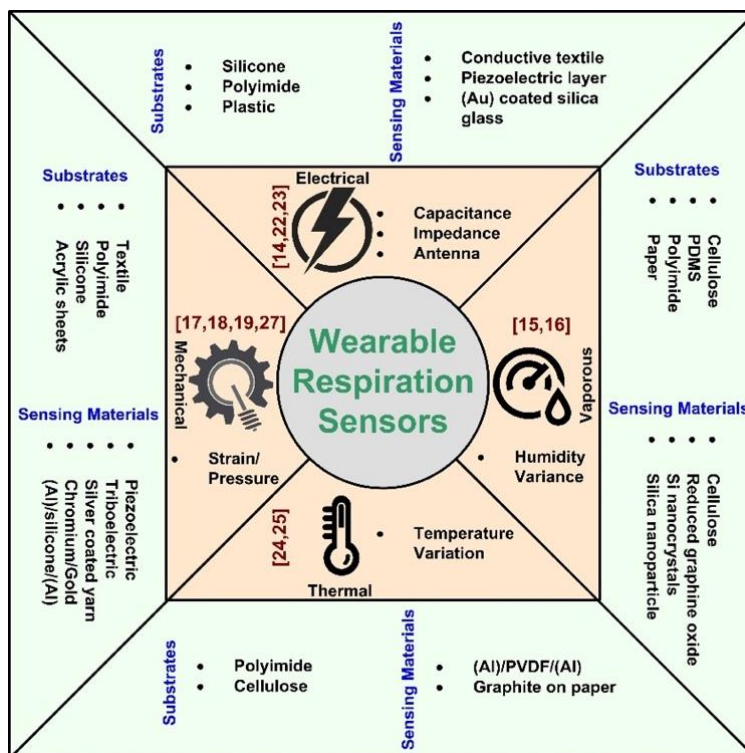

**Supplementary Figure 1.** Summary of recently-developed wearable respiration rate sensors. The main categories of signal transduction are based on electrical, mechanical, thermal and humidity stimuli.

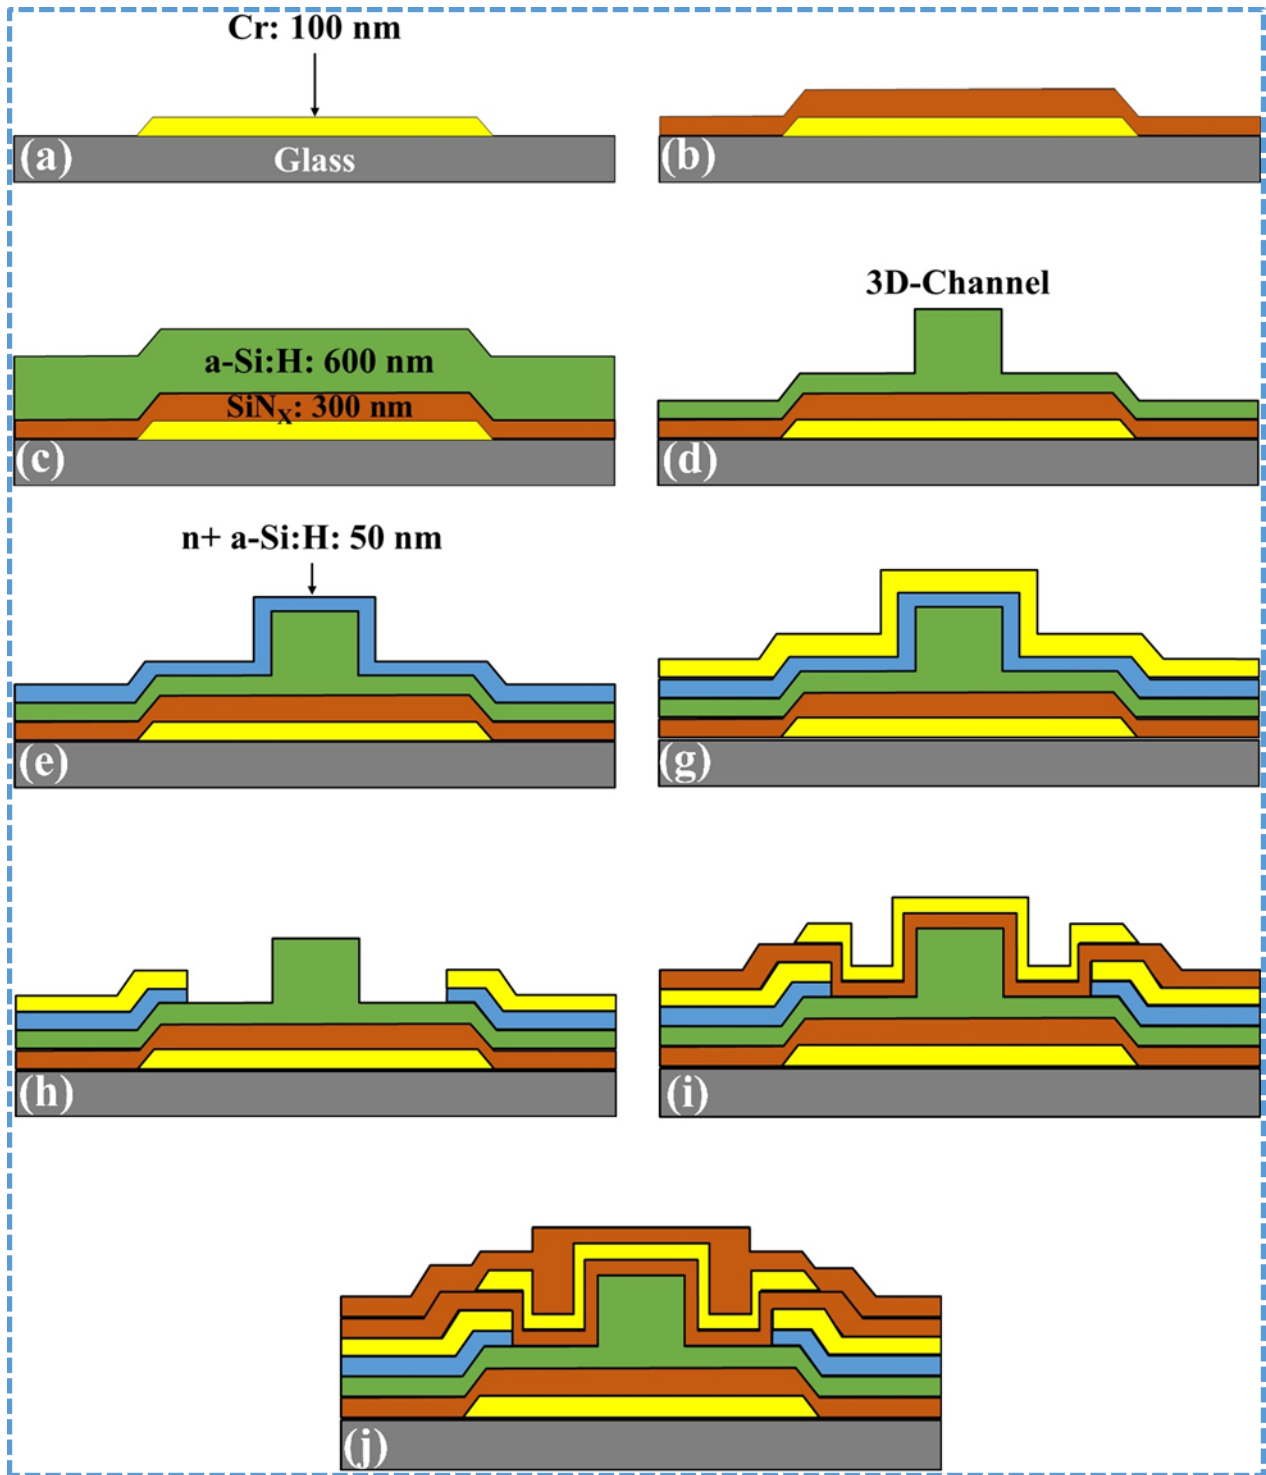

Supplementary Figure 2. Device layouts and fabrication steps of 3-D FIN-shaped a-Si:H dual-gate thin film transistor (DG-TFT) on a glass substrate. Schematic illustration of fabrication steps of DG-TFT.

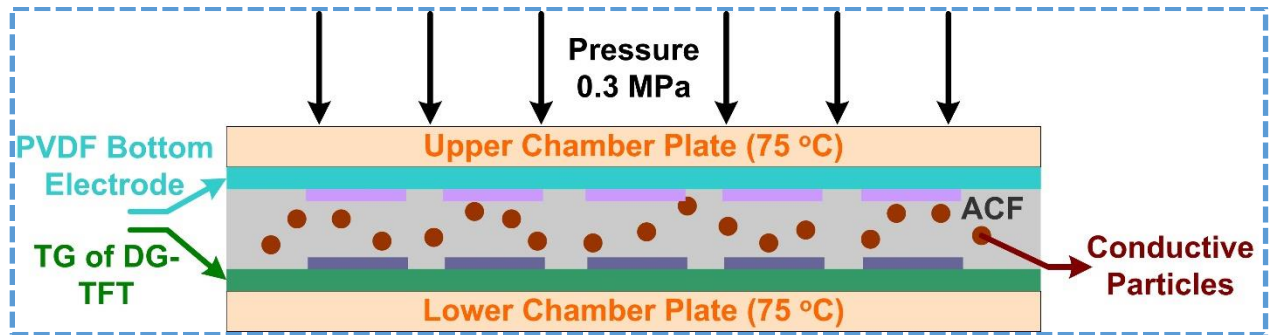

Supplementary Figure 3. Device layout and integration process of piezoelectric transducer film and 3-D FIN-shaped a-Si:H dual-gate thin film transistor (DG-TFT) on a glass substrate. Cross-sectional schematic illustration of PTGTFT fabrication by the integration of PVDF film and 3-D FIN-shaped DG-TFT.

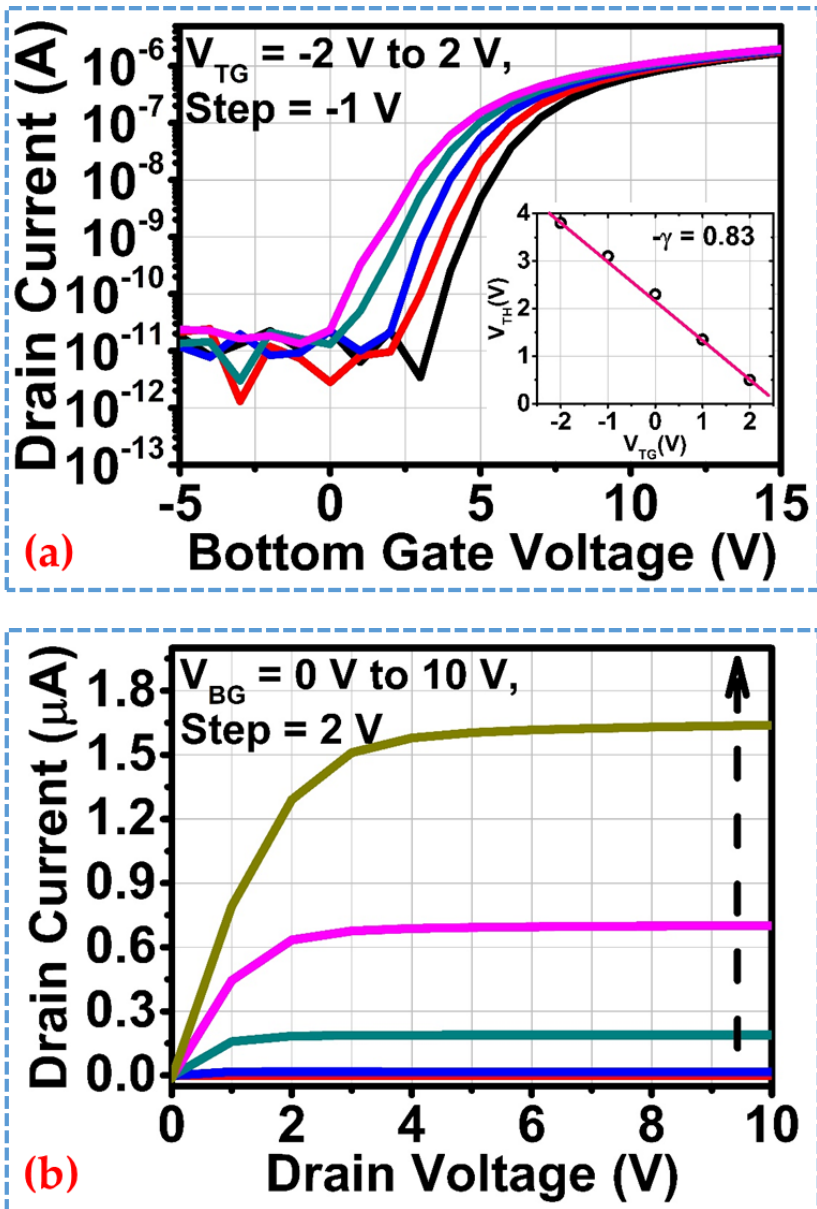

Supplementary Figure 4. Electrical characterization of 3-D FIN-shaped a-Si:H dual-gate thin film transistor (DG-TFT) on a glass substrate. (a) Transfer characteristics, inset shows value of the extracted dependence parameter ( $\gamma$ ) and (b) Output characteristics.

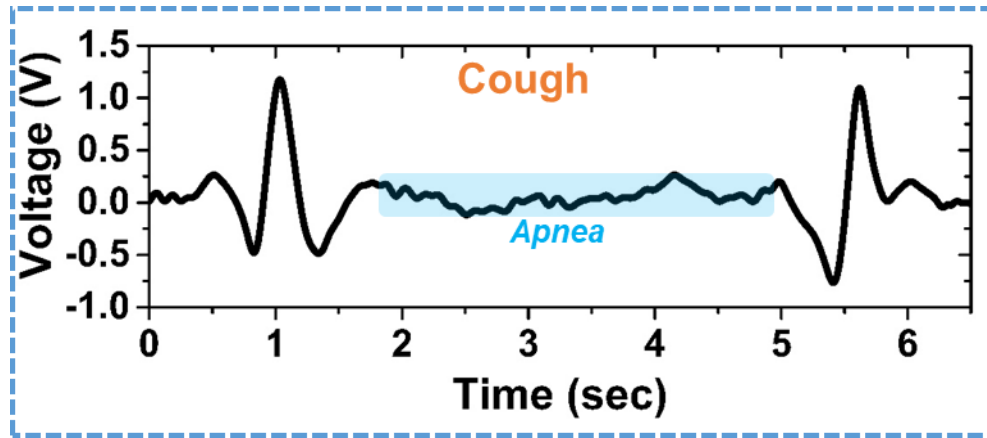

**Supplementary Figure 5.** Electric response of the PTGTFT to successive mechanical motions (cough and holding breath).

**Supplementary Table 1.** The averaged respiration rate of a single subject over multiple days for normal and moderate breathing acquired from the PTGTFT at two peripheral points (neck and chest) and ECG-derived-respiration (EDR).

| Measurement Day # | Normal Breathing |                |      | Moderate Breathing |                |      |
|-------------------|------------------|----------------|------|--------------------|----------------|------|
|                   | Neck Position    | Chest Position | EDR  | Neck Position      | Chest Position | EDR  |
| 1                 | 17 ± 2.6         | 17.5 ± 2.5     | 18   | 21 ± 2.5           | 20.5 ± 1.5     | 22   |
| 2                 | 14.6 ± 1.06      | 14 ± 1.5       | 15.5 | 19 ± 1.1           | 20.7 ± 1.3     | 20   |
| 3                 | 16.5 ± 2.3       | 16.5 ± 1.6     | 16.5 | 19 ± 0.5           | 19 ± 0.9       | 20   |
| 4                 | 17.3 ± 0.9       | 17 ± 1.2       | 18.5 | 22 ± 2.3           | 21 ± 1.5       | 19.5 |
| 5                 | 14.5 ± 2.1       | 15 ± 1.1       | 15.5 | 18 ± 1.4           | 17 ± 2.1       | 17.5 |
| 6                 | 16 ± 2.2         | 16 ± 1.5       | 17   | 20 ± 0.9           | 20 ± 1.1       | 20   |
